# Supplementary material
Source: MDPI journal article supplement (https://www.mdpi.com/2073-4441/13/10/1344)
Supplement: s1 [file s1]

Supplementary Materials

# Sediment Nutrient Flux Rates in a Shallow, Turbid Lake Are More Dependent on Water Quality Than Lake Depth

Jordan L. Evans <sup>1,3</sup>, Justin N. Murdock <sup>1,\*</sup>, Jason M. Taylor <sup>2</sup> and Richard E. Lizotte, Jr. <sup>2</sup>

Table S1. Water quality parameters by month, depth, and site.

| Month  | Depth   | Site | Depth (m) | Temperature (°C) | Conductivity (µS/cm) | DO (mg/L) | pH    | ORP (mV) | Secchi Depth (cm) | Ni-trate (µg/L) | SRP (µg/L) | Total Nitrogen (µg/L) | Total Phosphorus (µg/L) | Water Chlorophyll (µg/L) | Water AFDM (g/L) |
|--------|---------|------|-----------|------------------|----------------------|-----------|-------|----------|-------------------|-----------------|------------|-----------------------|-------------------------|--------------------------|------------------|
| April  |         | 1    |           | 21.65            | 180                  | 6.49      | 7.46  | 166.3    | 7                 | 1041.9          | 233.6      | 2456.4                | 676.1                   | 29.3                     | 0.100            |
|        |         | 2    |           | 22.71            | 177                  | 5.9       | 7.44  | 221.8    | 7.5               | 1623.1          | 191.3      | 2539.7                | 668.8                   | 4.7                      | 0.173            |
|        | Surface | 3    |           | 22.3             | 178                  | 6.48      | 7.34  | 242.8    | 7                 | 1623.1          | 139.2      | 2539.7                | 544.5                   | 8.9                      | 0.200            |
|        |         | 4    |           | 21.59            | 174                  | 6.02      | 7.18  | 251.7    | 6                 | 1623.1          | 101.1      | 2872.8                | 565.3                   | 5                        | 0.160            |
|        |         | 5    |           | 20.75            | 171                  | 5.33      | 7.4   | 280      | 7.5               | 1448.7          | 124.5      | 2539.7                | 673.4                   | 3.9                      | 0.180            |
|        | Mid     | 1    |           | 21.06            | 177                  | 5.04      | 7.38  | 170.2    | -                 | 867.5           | 107.5      | 2664.6                | 714.8                   | 16.8                     | 0.117            |
|        |         | 2    |           | 21.65            | 174                  | 4.84      | 7.37  | 224.2    | -                 | 1390.6          | 138.9      | 2581.3                | 563.4                   | 4.9                      | 0.000            |
|        |         | 3    |           | 21.41            | 174                  | 4.98      | 7.11  | 247.8    | -                 | 1332.5          | 150.9      | 2706.2                | 565                     | 6                        | 0.143            |
|        |         | 4    |           | 21.32            | 171                  | 5.33      | 7.14  | 252.5    | -                 | 1739.3          | 187.9      | 2747.9                | 636.1                   | 9.2                      | 0.064            |
|        |         | 5    |           | 20.71            | 168                  | 5.22      | 7.34  | 282.1    | -                 | 1623.1          | 100        | 2872.8                | 552.8                   | 5.9                      | 0.220            |
|        | Bottom  | 1    | 1.0       | 20.23            | 177                  | 3.7       | 7.31  | 174.2    | -                 | 693.2           | 304.5      | 2414.7                | 833.1                   | 14.3                     | 0.060            |
|        |         | 2    | 1.4       | 19.82            | 170                  | 2.9       | 7.31  | 227.8    | -                 | 1506.9          | 163        | 2664.6                | 819.5                   | 4.6                      | 0.253            |
|        |         | 3    | 1.4       | 20.75            | 170                  | 2.45      | 7.2   | 249.4    | -                 | 1565            | 148.3      | 2872.8                | 776.9                   | 5                        | 0.187            |
|        |         | 4    | 1.4       | 20.57            | 171                  | 4.6       | 7.12  | 255      | -                 | 1681.2          | 167.2      | 2456.4                | 811.6                   | 4.5                      | 0.182            |
|        |         | 5    | 0.9       | 20.73            | 170                  | 5.26      | 7.27  | 273.5    | -                 | 1681.2          | 116.2      | 2747.9                | 602.7                   | 2.1                      | 0.184            |
|        | Surface | 1    |           | 22.19            | 102                  | 5.47      | 7.51  | 181.4    | 6                 | 1390.6          | 49.8       | 2498                  | 542.9                   | 5.4                      | 0.340            |
|        |         | 2    |           | 23.1             | 97                   | 6.03      | 7.56  | 176      | 7.5               | 1739.3          | 70.9       | 2581.3                | 667.8                   | 15.2                     | 0.360            |
|        |         | 3    |           | 22.84            | 98                   | 6.23      | 7.6   | 178.4    | 6                 | 1506.8          | 78.1       | 2738.8                | 622.3                   | 11.4                     | 0.360            |
|        |         | 4    |           | 22.31            | 94                   | 6.11      | 7.62  | 181.3    | 5                 | 1623.1          | 81.1       | 2738.8                | 676.9                   | 10.6                     | 0.320            |
|        |         | 5    |           | 21.41            | 96                   | 5.95      | 7.84  | 150.2    | 3.5               | 1623.1          | 78.9       | 2920.7                | 624.2                   | 16.2                     | 0.320            |
| Mid    | 1       |      | 21.85     | 102              | 5.14                 | 7.45      | 180.7 | -        | 1158.1            | 55.8            | 2414.7     | 671.5                 | 2.8                     | 0.380                    |                  |
|        | 2       |      | 22.29     | 96               | 5.4                  | 7.5       | 176.6 | -        | 1564.9            | 72.1            | 2498       | 671.5                 | 8.7                     | 0.360                    |                  |
|        | May     | 3    |           | 22.38            | 96                   | 5.53      | 7.52  | 180.7    | -                 | 1681.2          | 84.1       | 2920.7                | 670.1                   | 8.1                      | 0.340            |
|        |         | 4    |           | 22.14            | 97                   | 5.82      | 7.55  | 180.5    | -                 | 1681.2          | 81.9       | 2738.8                | 642.9                   | 8.8                      | 0.360            |
|        |         | 5    |           | 21.42            | 94                   | 5.82      | 7.65  | 142.6    | -                 | 1739.3          | 80         | 2693.3                | 663.4                   | 18.5                     | 0.340            |
| Bottom | 1       | 0.9  | 21.5      | 102              | 5                    | 7.59      | 181.3 | -        | 1158.1            | 65.7            | 2373.1     | 834.4                 | 11.3                    | 0.440                    |                  |
|        | 2       | 1.2  | 22.03     | 96               | 5.3                  | 7.43      | 177   | -        | 1506.8            | 92.4            | 3011.7     | 663                   | 8.1                     | 0.360                    |                  |
|        | 3       | 1.3  | 22.28     | 97               | 5.34                 | 7.48      | 181.1 | -        | 1739.3            | 85.7            | 2875.2     | 676.9                 | 8.5                     | 0.360                    |                  |
|        | 4       | 1.1  | 22.17     | 95               | 5.78                 | 7.52      | 179.8 | -        | 1681.2            | 82.6            | 2784.3     | 607                   | 10.4                    | 0.360                    |                  |
|        | 5       | 0.7  | 21.42     | 96               | 5.81                 | 7.59      | 143.2 | -        | 1797.4            | 84.9            | 2602.4     | 679.8                 | 14.9                    | 0.380                    |                  |
|        | 1       |      | 26        | 103              | 4.6                  | 7.59      | 197.6 | 5        | 576.9             | 67.2            | 1829.1     | 500.1                 | 5.2                     | 0.180                    |                  |
|        | 2       |      | 26.76     | 105              | 4.69                 | 7.96      | 177.7 | 6        | 693.2             | 74.7            | 2011.1     | 422.7                 | 8.2                     | 0.180                    |                  |

|         |   |     |       |     |      |      |       |   |       |      |        |       |      |       |
|---------|---|-----|-------|-----|------|------|-------|---|-------|------|--------|-------|------|-------|
| Surface | 3 |     | 26.68 | 97  | 5.15 | 7.79 | 188.8 | 7 | 751.3 | 69.8 | 1965.6 | 497.5 | 3.9  | 0.180 |
|         | 4 |     | 26.76 | 102 | 5.6  | 7.81 | 205.6 | 7 | 635.1 | 64.1 | 1915.1 | 509.2 | 5.1  | 0.160 |
|         | 5 |     | 26.74 | 107 | 5.17 | 7.84 | 189.9 | 6 | 809.4 | 70.6 | 2081.6 | 512.8 | 13.3 | 0.040 |
|         | 1 |     | 25.53 | 103 | 4.39 | 7.54 | 192.8 | - | 809.4 | 61.1 | 2102.1 | 442.2 | 12.6 | 0.200 |
| Mid     | 2 |     | 26.06 | 104 | 4.98 | 7.82 | 182.7 | - | 576.9 | 72.8 | 2011.1 | 441   | 9.2  | 0.180 |
| June    | 3 |     | 26.22 | 99  | 4.97 | 7.67 | 190.1 | - | 809.4 | 62.6 | 2056.5 | 490.7 | 7.3  | 0.160 |
|         | 4 |     | 26.74 | 102 | 5.45 | 7.7  | 205.2 | - | 693.2 | 64.1 | 1965.6 | 428.7 | 7.9  | 0.180 |
|         | 5 |     | 26.59 | 106 | 5.16 | 7.74 | 190.6 | - | 809.4 | 55.5 | 2123.2 | 503.2 | 12.6 | 0.180 |
|         | 1 | 0.9 | 25.2  | 102 | 3.9  | 7.47 | 188.9 | - | 576.9 | 58.1 | 1920.1 | 513.5 | 8.9  | 0.200 |
|         | 2 | 1.2 | 25.88 | 103 | 4.6  | 7.69 | 187.1 | - | 635.1 | 49.4 | 1874.6 | 593.5 | 7.3  | 0.160 |
| Bottom  | 3 | 1.2 | 26.15 | 99  | 4.82 | 7.59 | 192   | - | 693.2 | 54.7 | 1920.1 | 427.2 | 7    | 0.180 |
|         | 4 | 1.1 | 26.58 | 100 | 5.26 | 7.64 | 203.7 | - | 635.1 | 67.2 | 1998.3 | 448.3 | 8.8  | 0.160 |
|         | 5 | 0.8 | 26.51 | 107 | 5.08 | 7.68 | 190.1 | - | 635.1 | 66   | 2414.7 | 441.4 | 3.2  | 0.160 |

Table S2. Nutrient and gas flux rates for the field collected cores.

| Month | Site | Depth Habitat | Distance To Shore | Lake Depth | NO <sub>3</sub> Flux (mg/m <sup>2</sup> /h) | SRP Flux (mg/m <sup>2</sup> /h) |
|-------|------|---------------|-------------------|------------|---------------------------------------------|---------------------------------|
| April | 1    | Mid Lake      | 30                | 1          | 19.127                                      | -3.474                          |
| April | 1    | Tree          | 17                | 0.9        | 19.127                                      | 1.672                           |
| April | 1    | Shore         | 3                 | 0.6        | 15.306                                      | -2.649                          |
| April | 2    | Mid Lake      | 43                | 1.4        | 3.821                                       | 3.300                           |
| April | 2    | Tree          | 17                | 1.2        | 5.102                                       | -0.803                          |
| April | 2    | Shore         | 2                 | 0.5        | 2.540                                       | -2.497                          |
| April | 3    | Mid Lake      | 45                | 1.4        | -25.510                                     | 0.304                           |
| April | 3    | Tree          | 16                | 1.1        | -10.204                                     | 0.651                           |
| April | 3    | Shore         | 2                 | 0.6        | -8.923                                      | 1.368                           |
| April | 4    | Mid Lake      | 49                | 1.4        | 2.540                                       | -1.042                          |
| April | 4    | Tree          | 10                | 0.85       | 0.000                                       | 0.065                           |
| April | 4    | Shore         | 1                 | 0.5        | -5.102                                      | 1.672                           |
| April | 5    | Mid Lake      | 38                | 0.85       | 22.948                                      | 1.824                           |
| April | 5    | Mid Lake      | 38                | 0.85       | 2.540                                       | 2.128                           |
| April | 5    | Tree          | 12                | 0.7        | 22.948                                      | 2.171                           |
| April | 5    | Shore         | 4                 | 0.6        | 19.127                                      | 2.497                           |
| May   | 1    | Mid Lake      | 30                | 0.9        | 0.000                                       | -0.022                          |
| May   | 1    | Tree          | 17                | 0.7        | 8.663                                       | -0.695                          |
| May   | 1    | Shore         | 10                | 0.5        | 0.000                                       | -0.434                          |
| May   | 2    | Mid Lake      | 49                | 1.2        | 1.238                                       | -3.213                          |
| May   | 2    | Tree          | 17                | 1.1        | -3.713                                      | -3.213                          |
| May   | 2    | Shore         | 1                 | 0.6        | 2.475                                       | -3.517                          |
| May   | 3    | Mid Lake      | 48                | 1.3        | -3.713                                      | 1.151                           |
| May   | 3    | Tree          | 17                | 1          | 4.950                                       | 0.304                           |
| May   | 3    | Shore         | 10                | 0.6        | 0.000                                       | 0.217                           |
| May   | 4    | Mid Lake      | 38                | 1.1        | 8.663                                       | 1.303                           |
| May   | 4    | Tree          | 17                | 1          | -1.238                                      | 0.999                           |
| May   | 4    | Shore         | 1                 | 0.6        | 1.238                                       | 0.087                           |
| May   | 5    | Mid Lake      | 35                | 0.7        | -3.713                                      | 0.304                           |
| May   | 5    | Tree          | 16                | 0.6        | 8.663                                       | -1.411                          |
| May   | 5    | Shore         | 4                 | 0.3        | 0.000                                       | 0.087                           |
| June  | 1    | Mid Lake      | 30                | 0.85       | -1.259                                      | -1.780                          |
| June  | 1    | Tree          | 19                | 0.7        | -1.259                                      | -1.889                          |
| June  | 1    | Shore         | 4                 | 0.3        | -7.555                                      | -1.020                          |
| June  | 2    | Mid Lake      | 42                | 1.2        | -3.778                                      | -0.282                          |

|      |   |          |    |     |        |        |
|------|---|----------|----|-----|--------|--------|
| June | 2 | Tree     | 20 | 1.1 | -3.778 | 0.608  |
| June | 2 | Shore    | 10 | 0.8 | 2.540  | 0.934  |
| June | 3 | Mid Lake | 40 | 1.2 | -2.540 | -1.216 |
| June | 3 | Tree     | 18 | 1.1 | 5.037  | -1.563 |
| June | 3 | Shore    | 10 | 0.7 | -5.059 | -0.868 |
| June | 4 | Mid Lake | 46 | 1.1 | -3.778 | -4.711 |
| June | 4 | Tree     | 26 | 1.1 | 2.540  | -3.517 |
| June | 4 | Shore    | 4  | 0.5 | -3.778 | -3.278 |
| June | 5 | Mid Lake | 30 | 0.8 | 0.000  | 1.389  |
| June | 5 | Tree     | 22 | 0.7 | 1.259  | -0.847 |
| June | 5 | Shore    | 4  | 0.3 | -6.318 | -0.391 |
| June | 6 | Mid Lake | 1  | 0.6 | 6.318  | 1.433  |
| June | 6 | Tree     | 1  | 0.6 | 3.778  | 1.455  |
| June | 6 | Shore    | 1  | 0.6 | 10.095 | 1.585  |

Table S3. Nutrient and gas flux rates for the laboratory temperature experiment.

| Temperature Treatment | NO <sub>3</sub> Flux<br>(mg/m <sup>2</sup> /h) | SRP Flux<br>(mg/m <sup>2</sup> /h) | Denitrification<br>(mg N <sub>2</sub> /m <sup>2</sup> /h) | Sediment Oxygen Demand<br>(mg O <sub>2</sub> /m <sup>2</sup> /h) |
|-----------------------|------------------------------------------------|------------------------------------|-----------------------------------------------------------|------------------------------------------------------------------|
| 10                    | -32.42                                         | -1.90                              | 1.46                                                      | -64.65                                                           |
| 10                    | -29.38                                         | -0.99                              | 1.85                                                      | -56.92                                                           |
| 10                    | -30.39                                         | -1.86                              | 1.39                                                      | -71.28                                                           |
| 10                    | -31.41                                         | -2.19                              | 2.05                                                      | -61.15                                                           |
| 10                    | -30.39                                         | -2.23                              | 1.94                                                      | -67.23                                                           |
| 10                    | -31.41                                         | -2.03                              | 1.14                                                      | -42.00                                                           |
| 10                    | -33.43                                         | -1.60                              | 1.06                                                      | -44.02                                                           |
| 10                    | -32.42                                         | -1.46                              | 1.58                                                      | -68.89                                                           |
| 10                    | -31.41                                         | -1.90                              | 1.61                                                      | -40.34                                                           |
| 20                    | 1.74                                           | -0.57                              | 3.00                                                      | -106.89                                                          |
| 20                    | 1.74                                           | -0.57                              | 3.00                                                      | -106.89                                                          |
| 20                    | 1.74                                           | -0.47                              | 1.60                                                      | -94.25                                                           |
| 20                    | 3.47                                           | -0.25                              | 3.19                                                      | -111.31                                                          |
| 20                    | 1.74                                           | -0.22                              |                                                           | -106.89                                                          |
| 20                    | 0.87                                           | -0.17                              | 0.10                                                      | -46.10                                                           |
| 20                    | 3.47                                           | -0.11                              | 1.50                                                      | -92.36                                                           |
| 20                    | 25.18                                          | 4.07                               | -0.07                                                     | -44.68                                                           |
| 20                    | 1.74                                           | -0.06                              | 3.71                                                      | -114.46                                                          |
| 20                    | 2.60                                           | 0.58                               | 0.82                                                      | -41.68                                                           |
| 30                    | 0.00                                           | 1.52                               | -0.95                                                     | -89.02                                                           |
| 30                    | 0.00                                           | 0.76                               | 0.10                                                      | -97.29                                                           |
| 30                    | 0.00                                           | 1.72                               | 4.80                                                      | -91.70                                                           |
| 30                    | 7.38                                           | 0.89                               | 0.32                                                      | -50.10                                                           |
| 30                    | 1.23                                           | 0.09                               | 4.55                                                      | -117.42                                                          |
| 30                    | -1.23                                          | 0.76                               | 2.11                                                      | -38.92                                                           |
| 30                    | 0.00                                           | 0.81                               | 2.58                                                      | -55.92                                                           |
| 30                    | 2.46                                           | 0.67                               | 4.90                                                      | -116.98                                                          |
| 30                    | -2.46                                          | 0.83                               | 3.44                                                      | -101.32                                                          |

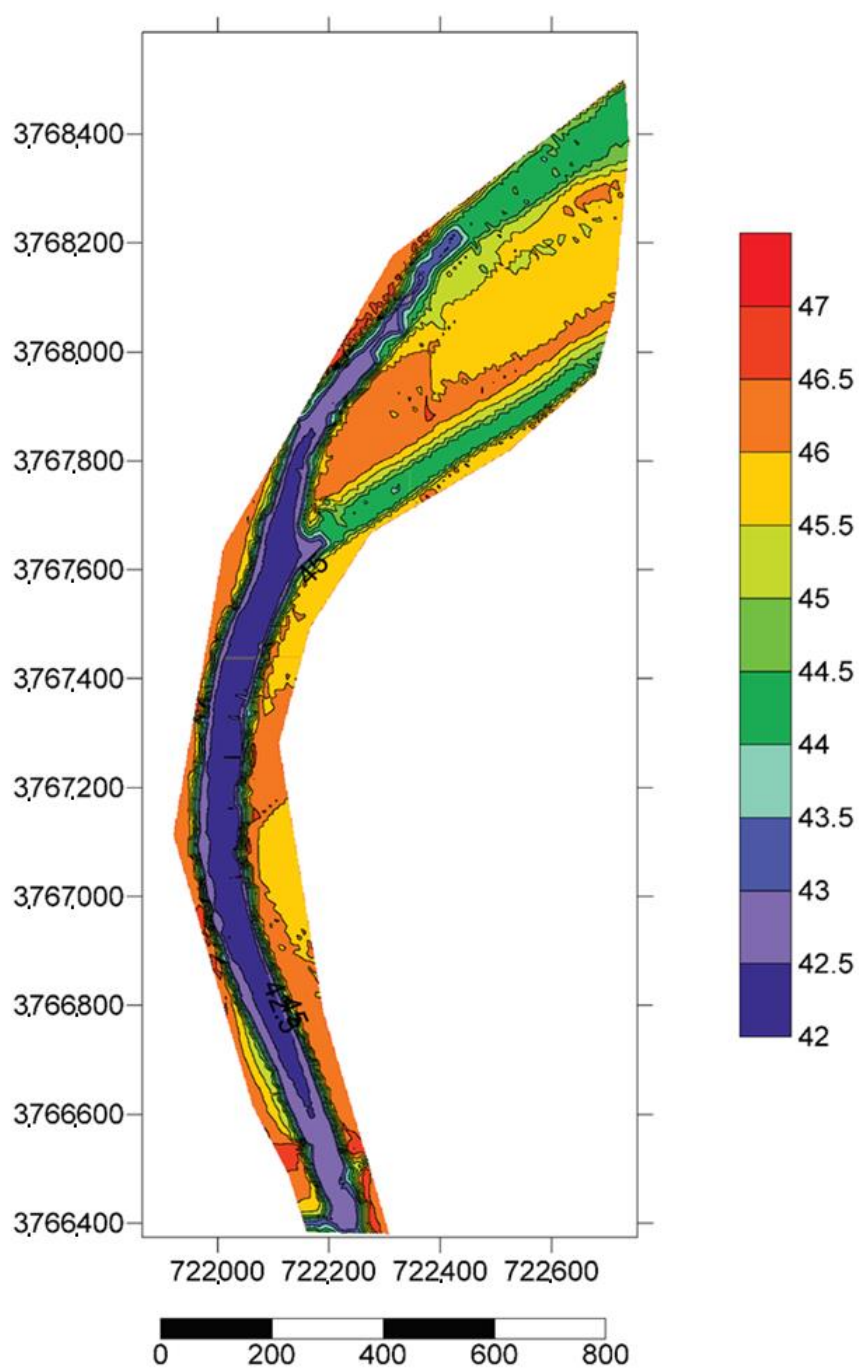

**Figure S1.** Bathymetry of Roundaway Lake: x-axis is west longitude and y-axis is north latitude; color legend depicts watershed elevation in meters above mean sea level; and black and white legend depicts distance in meters.

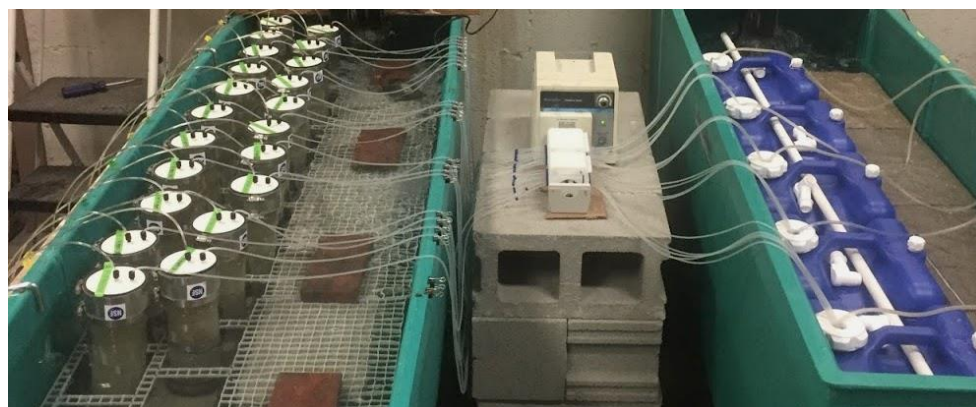

**Figure S2.** Flow-through sediment core incubation setup used in this study. Cores and source water were maintained at ambient lake temperature using controlled-temperature water bath tanks.

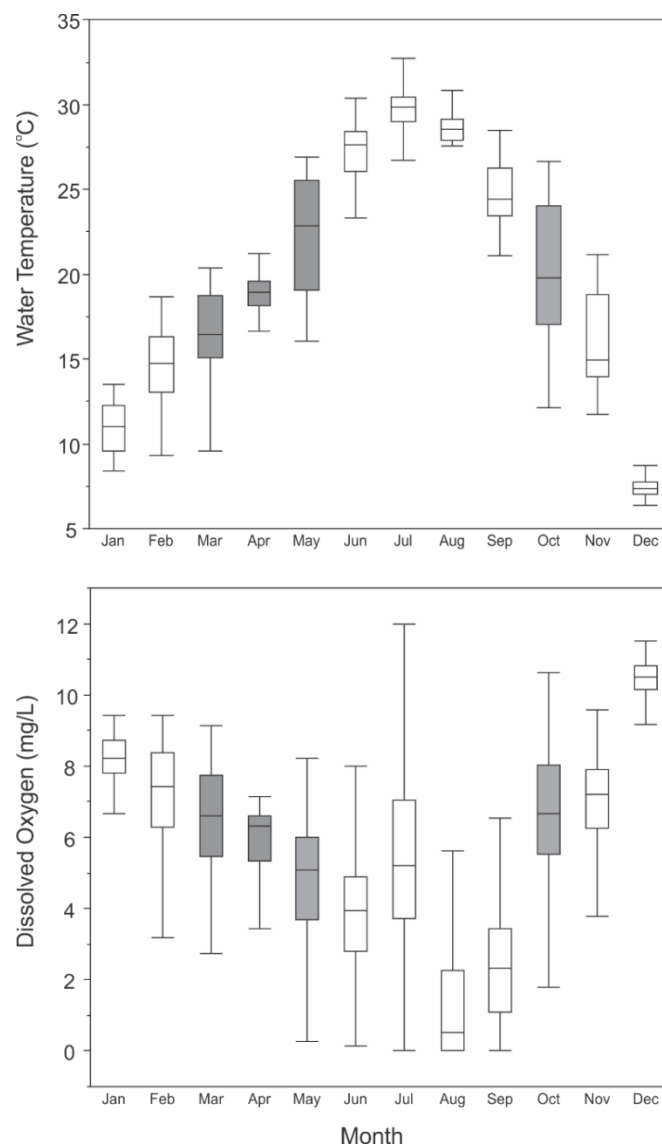

**Figure S3.** Monthly water temperature and dissolved oxygen at the bottom of water column) for Roundaway Lake at site 3. Gray boxes denote months samples were collected. Boxes show median values, with 25% and 75% percentiles. Whiskers are 5% and 95% percentiles. Data taken at site 3, Roundaway Lake in 2017 from USDA ARS long-term monitoring; R. Lizotte, unpublished data.
